# Supplementary material for: Detection of blaKPC and blaNDM carbapenemase genes among Klebsiella pneumoniae isolates in Addis Ababa, Ethiopia: Dominance of blaNDM
Source: PubMed Central journal article supplement (PMC9045624; doi:10.1371/journal.pone.0267657), 2022-04-27
Supplement: pone.0267657.s001.pdf [file pone.0267657.s001.pdf]

**S1 Table. Antimicrobial susceptibility pattern and MDR status of 132 *K. pneumoniae* isolates at Tikur Anbessa Specialized Hospital**

| Code | TET | GM | AN | CIP | ATM | PTZ | AMC | SXT | CHL | CXT | CRO | MEM | IMP | ETM | MDR Status |
|------|-----|----|----|-----|-----|-----|-----|-----|-----|-----|-----|-----|-----|-----|------------|
| 1    | 11  | 8  | 23 | 17  | 19  | 13  | 6   | 6   | 23  | 18  | 6   | 30  | 28  | 24  | MDR        |
|      | R   | R  | S  | R   | I   | R   | R   | R   | S   | S   | R   | S   | S   | S   |            |
| 2    | 7   | 8  | 22 | 26  | 19  | 12  | 10  | 6   | 25  | 20  | 6   | 28  | 26  | 26  | MDR        |
|      | R   | R  | S  | S   | I   | R   | R   | R   | S   | S   | R   | S   | S   | S   |            |
| 3    | 12  | 6  | 22 | 16  | 17  | 13  | 6   | 6   | 23  | 17  | 6   | 28  | 27  | 23  | MDR        |
|      | I   | R  | S  | I   | R   | R   | R   | R   | S   | I   | R   | S   | S   | S   |            |
| 4    | 6   | 12 | 19 | 26  | 19  | 24  | 18  | 6   | 21  | 18  | 6   | 23  | 24  | 27  | MDR        |
|      | R   | R  | S  | S   | I   | S   | S   | R   | S   | S   | R   | S   | S   | S   |            |
| 5    | 15  | 10 | 27 | 22  | 15  | 23  | 15  | 6   | 22  | 16  | 10  | 31  | 25  | 25  | MDR        |
|      | S   | R  | S  | S   | R   | S   | I   | R   | S   | I   | R   | S   | S   | S   |            |
| 6    | 12  | 8  | 22 | 21  | 18  | 18  | 12  | 6   | 22  | 20  | 6   | 26  | 26  | 23  | MDR        |
|      | I   | R  | S  | S   | I   | I   | R   | R   | S   | S   | R   | S   | S   | S   |            |
| 7    | 6   | 8  | 21 | 20  | 19  | 23  | 6   | 6   | 6   | 19  | 6   | 29  | 28  | 28  | MDR        |
|      | R   | R  | S  | S   | I   | S   | R   | R   | S   | S   | R   | S   | S   | S   |            |
| 8    | 17  | 10 | 23 | 6   | 8   | 21  | 13  | 6   | 23  | 16  | 6   | 31  | 26  | 25  | MDR        |
|      | S   | R  | S  | R   | R   | S   | R   | R   | S   | I   | R   | S   | S   | S   |            |
| 9    | 6   | 11 | 28 | 28  | 10  | 23  | 16  | 6   | 15  | 16  | 6   | 29  | 27  | 23  | MDR        |
|      | R   | R  | S  | S   | R   | S   | I   | R   | I   | I   | R   | S   | S   | S   |            |
| 10   | 6   | 11 | 23 | 17  | 13  | 22  | 12  | 6   | 6   | 19  | 6   | 30  | 25  | 24  | MDR        |
|      | R   | R  | S  | I   | R   | S   | R   | R   | R   | S   | R   | S   | S   | S   |            |
| 11   | 16  | 15 | 25 | 9   | 13  | 20  | 15  | 6   | 6   | 17  | 6   | 25  | 26  | 26  | MDR        |
|      | S   | S  | S  | R   | R   | S   | I   | R   | R   | I   | R   | S   | S   | S   |            |
| 12   | 6   | 13 | 23 | 21  | 19  | 22  | 6   | 6   | 6   | 6   | 12  | 24  | 24  | 24  | MDR        |
|      | R   | I  | S  | S   | I   | S   | R   | R   | R   | R   | R   | S   | S   | S   |            |
| 13   | 6   | 12 | 21 | 6   | 20  | 21  | 11  | 6   | 6   | 19  | 6   | 27  | 28  | 23  | MDR        |
|      | R   | R  | S  | R   | I   | S   | R   | R   | R   | S   | R   | S   | S   | S   |            |

**Zone of inhibition in millimeter (mm)**

**Interpretation: S: Sensitive; I:Intermidate; R: Resistant**

TET: Tetracycline; GN: Gentamicin; AN: Amikacin; CIP: Ciprofloxacin; ATM: Aztreonam; PTZ: Piperacillin/tazobactam; AMC: Amoxicillin-clavulanate; SXT: Trimethoprim/sulfamethoxazole; CHL: Chloramphenicol; CXT: Cefoxitin; CRO: Ceftriaxone; MEM: Meropenem; IMP: Imipenem; ETM: Ertapenem

|    |    |    |    |    |    |    |    |    |    |    |    |    |    |    |     |
|----|----|----|----|----|----|----|----|----|----|----|----|----|----|----|-----|
| 14 | 16 | 7  | 17 | 6  | 6  | 14 | 10 | 6  | 6  | 6  | 6  | 8  | 23 | 6  | MDR |
|    | S  | R  | S  | R  | R  | R  | R  | R  | R  | R  | R  | R  | S  | R  |     |
| 15 | 6  | 11 | 22 | 18 | 17 | 19 | 18 | 6  | 6  | 21 | 9  | 25 | 28 | 28 | MDR |
|    | R  | R  | S  | I  | R  | I  | S  | R  | R  | S  | R  | S  | S  | S  |     |
| 16 | 6  | 12 | 25 | 6  | 6  | 13 | 6  | 6  | 16 | 6  | 6  | 13 | 20 | 6  | MDR |
|    | R  | R  | S  | R  | R  | R  | R  | R  | I  | R  | R  | R  | I  | R  |     |
| 17 | 6  | 12 | 25 | 16 | 6  | 20 | 12 | 6  | 25 | 21 | 6  | 29 | 28 | 23 | MDR |
|    | R  | R  | S  | I  | R  | I  | R  | R  | S  | S  | R  | S  | S  | S  |     |
| 18 | 8  | 13 | 23 | 19 | 20 | 23 | 7  | 6  | 6  | 13 | 11 | 29 | 28 | 24 | MDR |
|    | R  | I  | S  | I  | I  | S  | R  | R  | R  | R  | R  | S  | S  | S  |     |
| 19 | 18 | 6  | 24 | 27 | 7  | 19 | 6  | 6  | 6  | 18 | 6  | 31 | 26 | 25 | MDR |
|    | S  | R  | S  | S  | R  | I  | R  | R  | R  | S  | R  | S  | S  | S  |     |
| 20 | 11 | 15 | 19 | 14 | 6  | 17 | 9  | 6  | 6  | 6  | 6  | 24 | 24 | 19 | MDR |
|    | R  | S  | S  | R  | R  | R  | R  | R  | R  | R  | R  | S  | S  | I  |     |
| 21 | 11 | 24 | 25 | 28 | 22 | 14 | 9  | 20 | 27 | 6  | 16 | 25 | 27 | 25 | MDR |
|    | R  | S  | S  | S  | S  | R  | R  | S  | S  | R  | R  | S  | S  | S  |     |
| 22 | 6  | 12 | 24 | 26 | 14 | 20 | 11 | 6  | 6  | 20 | 6  | 24 | 26 | 25 | MDR |
|    | R  | R  | S  | S  | R  | I  | R  | R  | R  | S  | R  | S  | S  | S  |     |
| 23 | 16 | 12 | 27 | 29 | 14 | 20 | 13 | 6  | 14 | 17 | 6  | 29 | 23 | 23 | MDR |
|    | S  | R  | S  | S  | R  | I  | R  | R  | I  | I  | R  | S  | S  | S  |     |
| 24 | 13 | 10 | 20 | 19 | 16 | 19 | 6  | 6  | 23 | 6  | 8  | 25 | 24 | 22 | MDR |
|    | I  | R  | S  | I  | R  | I  | R  | R  | S  | R  | R  | S  | S  | S  |     |
| 25 | 6  | 11 | 23 | 24 | 16 | 22 | 15 | 14 | 6  | 19 | 8  | 26 | 26 | 26 | MDR |
|    | R  | R  | S  | S  | R  | S  | I  | I  | R  | S  | R  | S  | S  | S  |     |
| 26 | 6  | 15 | 27 | 18 | 19 | 21 | 14 | 6  | 6  | 21 | 11 | 33 | 29 | 26 | MDR |
|    | R  | S  | S  | I  | I  | S  | I  | R  | R  | S  | R  | S  | S  | S  |     |
| 27 | 6  | 10 | 20 | 15 | 8  | 18 | 6  | 6  | 6  | 6  | 6  | 24 | 26 | 20 | MDR |
|    | R  | R  | S  | R  | R  | I  | R  | R  | R  | R  | R  | S  | S  | I  |     |
| 28 | 6  | 14 | 27 | 18 | 20 | 23 | 16 | 6  | 6  | 24 | 11 | 32 | 29 | 25 | MDR |
|    | R  | I  | S  | I  | S  | S  | I  | R  | R  | S  | R  | S  | S  | S  |     |
| 29 | 10 | 9  | 23 | 25 | 12 | 18 | 10 | 6  | 21 | 16 | 6  | 27 | 25 | 22 | MDR |

### Zone of inhibition in millimeter (mm)

**Interpretation: S: Sensitive; I:Intermidate; R: Resistant**

TET: Tetracycline; GN: Gentamicin; Amikacin; CIP: Ciprofloxacin; ATM: Aztreonam; PTZ: Piperacillin/tazobactam; AMC: Amoxicillin-clavulanate; SXT:Trimethoprim/sulfamethoxazole; CHL: Chloramphenicol; CXT: Cefoxitin; CRO: Ceftriaxone; MEM: Meropenem; IMP: Imipenem; ETM: Ertapenem

|    |    |    |    |    |    |    |    |    |    |    |   |    |    |    |     |
|----|----|----|----|----|----|----|----|----|----|----|---|----|----|----|-----|
|    | R  | R  | S  | S  | R  | I  | R  | R  | S  | I  | R | S  | S  | S  |     |
| 30 | 6  | 21 | 21 | 6  | 15 | 21 | 12 | 6  | 26 | 20 | 6 | 28 | 24 | 24 | MDR |
|    | R  | S  | S  | R  | R  | S  | R  | R  | S  | S  | R | S  | S  | S  |     |
| 31 | 15 | 10 | 19 | 6  | 6  | 6  | 6  | 6  | 17 | 6  | 6 | 6  | 19 | 6  | MDR |
|    | S  | R  | S  | R  | R  | R  | R  | R  | I  | R  | R | R  | R  | R  |     |
| 32 | 10 | 6  | 18 | 21 | 12 | 13 | 6  | 6  | 24 | 10 | 9 | 21 | 22 | 18 | MDR |
|    | R  | R  | S  | S  | R  | R  | R  | R  | S  | R  | R | I  | I  | R  |     |
| 33 | 15 | 10 | 16 | 6  | 6  | 6  | 6  | 6  | 21 | 6  | 6 | 6  | 17 | 6  | MDR |
|    | S  | R  | I  | R  | R  | R  | R  | R  | S  | R  | R | R  | R  | R  |     |
| 34 | 13 | 6  | 20 | 6  | 14 | 16 | 8  | 6  | 6  | 6  | 6 | 23 | 25 | 23 | MDR |
|    | I  | R  | S  | R  | R  | R  | R  | R  | R  | R  | R | S  | S  | S  |     |
| 35 | 8  | 10 | 26 | 25 | 18 | 25 | 6  | 6  | 18 | 6  | 8 | 28 | 27 | 25 | MDR |
|    | R  | R  | S  | S  | I  | S  | R  | R  | S  | R  | R | S  | S  | S  |     |
| 36 | 16 | 14 | 26 | 23 | 15 | 23 | 6  | 26 | 23 | 6  | 6 | 28 | 28 | 26 | MDR |
|    | S  | I  | S  | S  | R  | S  | R  | S  | S  | R  | R | S  | S  | S  |     |
| 37 | 6  | 17 | 24 | 15 | 10 | 24 | 18 | 6  | 6  | 19 | 8 | 29 | 31 | 26 | MDR |
|    | R  | S  | S  | R  | R  | S  | S  | R  | R  | S  | R | S  | S  | S  |     |
| 38 | 6  | 12 | 26 | 29 | 6  | 15 | 12 | 6  | 6  | 8  | 6 | 23 | 26 | 23 | MDR |
|    | R  | R  | S  | S  | R  | R  | R  | R  | R  | R  | R | S  | S  | S  |     |
| 39 | 15 | 13 | 22 | 6  | 6  | 12 | 20 | 6  | 6  | 6  | 6 | 12 | 23 | 11 | MDR |
|    | S  | I  | S  | R  | R  | R  | S  | R  | R  | R  | R | R  | S  | R  |     |
| 40 | 6  | 22 | 22 | 22 | 16 | 22 | 11 | 6  | 24 | 18 | 8 | 23 | 25 | 24 | MDR |
|    | R  | S  | S  | S  | R  | S  | R  | R  | S  | S  | R | S  | S  | S  |     |
| 41 | 6  | 8  | 22 | 17 | 15 | 19 | 11 | 6  | 6  | 20 | 6 | 23 | 26 | 27 | MDR |
|    | R  | R  | S  | I  | R  | I  | R  | R  | R  | S  | R | S  | S  | S  |     |
| 42 | 6  | 8  | 16 | 20 | 10 | 17 | 6  | 6  | 16 | 10 | 6 | 29 | 30 | 26 | MDR |
|    | R  | R  | I  | I  | R  | R  | R  | R  | I  | R  | R | S  | S  | S  |     |
| 43 | 6  | 12 | 22 | 17 | 6  | 17 | 6  | 6  | 6  | 10 | 6 | 28 | 29 | 27 | MDR |
|    | R  | R  | S  | I  | R  | R  | R  | R  | R  | R  | R | S  | S  | S  |     |
| 44 | 6  | 22 | 22 | 15 | 8  | 19 | 16 | 6  | 6  | 12 | 6 | 29 | 27 | 24 | MDR |
|    | R  | S  | S  | R  | R  | I  | I  | R  | R  | R  | R | S  | S  | S  |     |

### Zone of inhibition in millimeter (mm)

**Interpretation: S: Sensitive; I:Intermidate; R: Resistant**

TET: Tetracycline; GN: Gentamicin; Amikacin; CIP: Ciprofloxacin; ATM: Aztreonam; PTZ: Piperacillin/tazobactam; AMC: Amoxicillin-clavulanate; SXT:Trimethoprim/sulfamethoxazole; CHL: Chloramphenicol; CXT: Cefoxitin; CRO: Ceftriaxone; MEM: Meropenem; IMP: Imipenem; ETM: Ertapenem

|    |    |    |    |    |    |    |    |    |    |    |    |    |    |    |     |
|----|----|----|----|----|----|----|----|----|----|----|----|----|----|----|-----|
| 45 | 17 | 21 | 22 | 17 | 19 | 21 | 16 | 6  | 24 | 22 | 6  | 26 | 27 | 24 | MDR |
|    | S  | S  | S  | I  | I  | S  | I  | R  | S  | S  | R  | S  | S  | S  |     |
| 46 | 11 | 6  | 19 | 27 | 6  | 20 | 17 | 6  | 12 | 18 | 6  | 27 | 27 | 23 | MDR |
|    | R  | R  | S  | S  | R  | I  | I  | R  | R  | S  | R  | S  | S  | S  |     |
| 47 | 18 | 6  | 17 | 20 | 10 | 22 | 17 | 6  | 24 | 20 | 6  | 26 | 28 | 25 | MDR |
|    | S  | R  | S  | I  | R  | S  | I  | R  | S  | S  | R  | S  | S  | S  |     |
| 48 | 10 | 12 | 20 | 6  | 6  | 19 | 15 | 6  | 6  | 21 | 6  | 26 | 26 | 23 | MDR |
|    | R  | R  | S  | R  | R  | S  | I  | R  | R  | S  | R  | S  | S  | S  |     |
| 49 | 12 | 6  | 11 | 6  | 6  | 6  | 17 | 6  | 6  | 6  | 6  | 21 | 20 | 12 | MDR |
|    | I  | R  | R  | R  | R  | R  | I  | R  | R  | R  | R  | I  | I  | R  |     |
| 50 | 8  | 6  | 6  | 6  | 6  | 6  | 6  | 19 | 6  | 6  | 6  | 8  | 21 | 6  | MDR |
|    | R  | R  | R  | R  | R  | R  | R  | S  | R  | R  | R  | R  | I  | R  |     |
| 51 | 13 | 6  | 14 | 6  | 6  | 6  | 6  | 6  | 6  | 6  | 6  | 6  | 6  | 6  | MDR |
|    | I  | R  | R  | R  | R  | R  | R  | R  | R  | R  | R  | R  | R  | R  |     |
| 52 | 6  | 6  | 18 | 24 | 22 | 22 | 18 | 6  | 6  | 21 | 16 | 26 | 28 | 25 | MDR |
|    | R  | R  | S  | S  | S  | S  | S  | R  | R  | S  | R  | S  | S  | S  |     |
| 53 | 13 | 7  | 17 | 18 | 18 | 18 | 15 | 6  | 6  | 22 | 6  | 27 | 26 | 24 | MDR |
|    | I  | R  | S  | I  | I  | I  | I  | R  | R  | S  | R  | S  | S  | S  |     |
| 54 | 12 | 6  | 18 | 6  | 6  | 8  | 6  | 6  | 17 | 6  | 6  | 6  | 6  | 6  | MDR |
|    | I  | R  | S  | R  | R  | R  | R  | R  | I  | R  | R  | R  | R  | R  |     |
| 55 | 15 | 6  | 18 | 15 | 6  | 18 | 13 | 6  | 10 | 19 | 6  | 26 | 27 | 23 | MDR |
|    | S  | R  | S  | R  | R  | I  | R  | R  | R  | S  | R  | S  | S  | S  |     |
| 56 | 24 | 18 | 20 | 6  | 6  | 6  | 6  | 6  | 6  | 6  | 6  | 6  | 6  | 6  | MDR |
|    | S  | S  | S  | R  | R  | R  | R  | R  | R  | R  | R  | R  | R  | R  |     |
| 57 | 15 | 7  | 21 | 6  | 6  | 6  | 6  | 6  | 19 | 6  | 6  | 6  | 6  | 6  | MDR |
|    | S  | R  | S  | R  | R  | R  | R  | R  | S  | R  | R  | R  | R  | R  |     |
| 58 | 9  | 16 | 18 | 24 | 14 | 21 | 16 | 6  | 21 | 20 | 6  | 27 | 27 | 24 | MDR |
|    | R  | S  | S  | S  | R  | S  | I  | R  | S  | S  | R  | S  | S  | S  |     |
| 59 | 11 | 6  | 17 | 16 | 12 | 19 | 14 | 6  | 25 | 23 | 10 | 27 | 26 | 24 | MDR |
|    | R  | R  | S  | I  | R  | I  | I  | R  | S  | S  | R  | S  | S  | S  |     |
| 60 | 6  | 9  | 23 | 25 | 22 | 23 | 15 | 6  | 10 | 23 | 6  | 25 | 26 | 30 | MDR |

### Zone of inhibition in millimeter (mm)

**Interpretation: S: Sensitive; I:Intermidate; R: Resistant**

TET: Tetracycline; GN: Gentamicin; Amikacin; CIP: Ciprofloxacin; ATM: Aztreonam; PTZ: Piperacillin/tazobactam; AMC: Amoxicillin-clavulanate; SXT: Trimethoprim/sulfamethoxazole; CHL: Chloramphenicol; CXT: Cefoxitin; CRO: Ceftriaxone; MEM: Meropenem; IMP: Imipenem; ETM: Ertapenem

|    |    |    |    |    |    |    |    |    |    |    |    |    |    |    |            |
|----|----|----|----|----|----|----|----|----|----|----|----|----|----|----|------------|
|    | R  | R  | S  | S  | S  | S  | I  | R  | R  | S  | R  | S  | S  | S  |            |
| 61 | 15 | 18 | 18 | 6  | 18 | 6  | 6  | 6  | 19 | 6  | 6  | 6  | 18 | 6  | MDR        |
|    | S  | S  | S  | R  | I  | R  | R  | R  | S  | R  | R  | R  | R  | R  |            |
| 62 | 6  | 22 | 25 | 26 | 23 | 24 | 22 | 6  | 6  | 23 | 6  | 27 | 28 | 30 | MDR        |
|    | R  | S  | S  | S  | S  | S  | S  | R  | R  | S  | R  | S  | S  | S  |            |
| 63 | 6  | 9  | 23 | 6  | 6  | 6  | 6  | 6  | 16 | 6  | 6  | 6  | 21 | 6  | MDR        |
|    | R  | R  | S  | R  | R  | R  | R  | R  | I  | R  | R  | R  | I  | R  |            |
| 64 | 6  | 7  | 18 | 6  | 6  | 6  | 6  | 6  | 15 | 6  | 6  | 6  | 19 | 6  | MDR        |
|    | R  | R  | S  | R  | R  | R  | R  | R  | I  | R  | R  | R  | R  | R  |            |
| 65 | 12 | 8  | 22 | 23 | 22 | 22 | 18 | 6  | 25 | 22 | 6  | 23 | 25 | 25 | MDR        |
|    | I  | R  | S  | S  | S  | S  | S  | R  | S  | S  | R  | S  | S  | S  |            |
| 66 | 6  | 10 | 20 | 15 | 18 | 19 | 12 | 6  | 8  | 20 | 6  | 23 | 25 | 25 | MDR        |
|    | R  | R  | S  | R  | I  | I  | R  | R  | R  | S  | R  | S  | S  | S  |            |
| 67 | 6  | 6  | 6  | 6  | 8  | 12 | 6  | 16 | 10 | 6  | 6  | 12 | 20 | 16 | MDR        |
|    | R  | R  | R  | R  | R  | R  | R  | S  | R  | R  | R  | R  | I  | R  |            |
| 68 | 6  | 22 | 22 | 6  | 18 | 21 | 13 | 6  | 24 | 21 | 6  | 26 | 28 | 31 | MDR        |
|    | R  | S  | S  | R  | I  | S  | R  | R  | S  | S  | R  | S  | S  | S  |            |
| 69 | 11 | 20 | 20 | 26 | 28 | 22 | 20 | 22 | 24 | 20 | 23 | 23 | 26 | 25 | Not<br>MDR |
|    | R  | S  | S  | S  | S  | S  | S  | S  | S  | S  | S  | S  | S  | S  |            |
| 70 | 6  | 11 | 22 | 17 | 9  | 15 | 8  | 6  | 6  | 7  | 6  | 17 | 26 | 20 | MDR        |
|    | R  | R  | S  | I  | R  | R  | R  | R  | R  | R  | R  | R  | S  | I  |            |
| 71 | 6  | 21 | 23 | 22 | 19 | 24 | 18 | 6  | 26 | 20 | 6  | 26 | 27 | 28 | MDR        |
|    | R  | S  | S  | S  | I  | S  | S  | R  | S  | S  | R  | S  | S  | S  |            |
| 72 | 6  | 19 | 22 | 22 | 20 | 24 | 20 | 6  | 25 | 20 | 6  | 24 | 28 | 26 | MDR        |
|    | R  | S  | S  | S  | I  | S  | S  | R  | S  | S  | R  | S  | S  | S  |            |
| 73 | 6  | 8  | 24 | 21 | 6  | 20 | 17 | 6  | 6  | 6  | 6  | 24 | 26 | 23 | MDR        |
|    | R  | R  | S  | S  | R  | I  | I  | R  | R  | R  | R  | S  | S  | S  |            |
| 74 | 14 | 6  | 16 | 6  | 6  | 6  | 6  | 6  | 6  | 6  | 6  | 10 | 12 | 6  | MDR        |
|    | I  | R  | I  | R  | R  | R  | R  | R  | R  | R  | R  | R  | R  | R  |            |
| 75 | 6  | 8  | 22 | 24 | 8  | 17 | 11 | 6  | 6  | 15 | 6  | 24 | 26 | 24 | MDR        |
|    | R  | R  | S  | S  | R  | R  | R  | R  | R  | I  | R  | S  | S  | S  |            |

### Zone of inhibition in millimeter (mm)

**Interpretation: S: Sensitive; I:Intermidate; R: Resistant**

TET: Tetracycline; GN: Gentamicin; Amikacin; CIP: Ciprofloxacin; ATM: Aztreonam; PTZ: Piperacillin/tazobactam; AMC: Amoxicillin-clavulanate; SXT: Trimethoprim/sulfamethoxazole; CHL: Chloramphenicol; CXT: Cefoxitin; CRO: Ceftriaxone; MEM: Meropenem; IMP: Imipenem; ETM: Ertapenem

|    |    |    |    |    |    |    |    |    |    |    |    |    |    |    |     |
|----|----|----|----|----|----|----|----|----|----|----|----|----|----|----|-----|
| 76 | 6  | 10 | 22 | 10 | 6  | 19 | 10 | 6  | 22 | 16 | 6  | 24 | 26 | 24 | MDR |
|    | R  | R  | S  | R  | R  | I  | R  | R  | S  | I  | R  | S  | S  | S  |     |
| 77 | 6  | 8  | 24 | 24 | 12 | 20 | 11 | 6  | 24 | 21 | 6  | 25 | 28 | 29 | MDR |
|    | R  | R  | S  | S  | R  | I  | R  | R  | S  | S  | R  | S  | S  | S  |     |
| 78 | 10 | 7  | 21 | 23 | 10 | 15 | 14 | 6  | 6  | 15 | 6  | 23 | 26 | 24 | MDR |
|    | R  | R  | S  | S  | R  | R  | I  | R  | R  | I  | R  | S  | S  | S  |     |
| 79 | 16 | 11 | 23 | 22 | 21 | 24 | 6  | 6  | 6  | 6  | 6  | 25 | 25 | 27 | MDR |
|    | S  | R  | S  | S  | S  | S  | R  | R  | R  | R  | R  | S  | S  | S  |     |
| 80 | 6  | 6  | 23 | 26 | 13 | 23 | 14 | 6  | 28 | 21 | 6  | 25 | 26 | 28 | MDR |
|    | R  | R  | S  | S  | R  | S  | I  | R  | S  | S  | R  | S  | S  | S  |     |
| 81 | 6  | 20 | 17 | 6  | 18 | 6  | 6  | 6  | 17 | 6  | 6  | 6  | 18 | 6  | MDR |
|    | R  | S  | S  | R  | I  | R  | R  | R  | I  | R  | R  | R  | R  | R  |     |
| 82 | 8  | 22 | 23 | 30 | 21 | 23 | 8  | 6  | 26 | 6  | 6  | 27 | 28 | 28 | MDR |
|    | R  | S  | S  | S  | I  | S  | R  | R  | S  | R  | R  | S  | S  | S  |     |
| 83 | 7  | 6  | 16 | 6  | 6  | 17 | 10 | 14 | 11 | 12 | 6  | 20 | 25 | 21 | MDR |
|    | R  | R  | I  | R  | R  | R  | R  | I  | R  | R  | R  | I  | S  | I  |     |
| 84 | 12 | 7  | 20 | 22 | 11 | 20 | 9  | 6  | 23 | 17 | 6  | 23 | 26 | 26 | MDR |
|    | I  | R  | S  | S  | R  | I  | R  | R  | S  | I  | R  | S  | S  | S  |     |
| 85 | 12 | 8  | 22 | 23 | 18 | 24 | 18 | 6  | 25 | 21 | 6  | 25 | 27 | 27 | MDR |
|    | I  | R  | S  | S  | I  | S  | S  | R  | S  | S  | R  | S  | S  | S  |     |
| 86 | 6  | 14 | 24 | 26 | 18 | 22 | 6  | 6  | 27 | 6  | 6  | 23 | 24 | 24 | MDR |
|    | R  | I  | S  | S  | I  | S  | R  | R  | S  | R  | R  | S  | S  | S  |     |
| 87 | 6  | 19 | 17 | 18 | 13 | 17 | 6  | 6  | 22 | 6  | 6  | 18 | 21 | 17 | MDR |
|    | R  | S  | S  | I  | R  | R  | R  | R  | S  | R  | R  | R  | I  | R  |     |
| 88 | 6  | 10 | 26 | 28 | 13 | 21 | 16 | 6  | 25 | 22 | 6  | 27 | 26 | 23 | MDR |
|    | R  | R  | S  | S  | R  | S  | I  | R  | S  | S  | R  | S  | S  | S  |     |
| 89 | 18 | 20 | 21 | 22 | 20 | 24 | 20 | 6  | 22 | 17 | 26 | 24 | 26 | 24 | MDR |
|    | S  | S  | S  | S  | I  | S  | S  | R  | S  | I  | S  | S  | S  | S  |     |
| 90 | 6  | 7  | 18 | 6  | 6  | 6  | 6  | 6  | 16 | 6  | 6  | 6  | 14 | 6  | MDR |
|    | R  | R  | S  | R  | R  | R  | R  | R  | I  | R  | R  | R  | R  | R  |     |
| 91 | 6  | 19 | 22 | 19 | 19 | 21 | 15 | 6  | 26 | 19 | 11 | 24 | 28 | 27 | MDR |

### Zone of inhibition in millimeter (mm)

**Interpretation: S: Sensitive; I:Intermidate; R: Resistant**

TET: Tetracycline; GN: Gentamicin; Amikacin; CIP: Ciprofloxacin; ATM: Aztreonam; PTZ: Piperacillin/tazobactam; AMC: Amoxicillin-clavulanate; SXT:Trimethoprim/sulfamethoxazole; CHL: Chloramphenicol; CXT: Cefoxitin; CRO: Ceftriaxone; MEM: Meropenem; IMP: Imipenem; ETM: Ertapenem

|     |    |    |    |    |    |    |    |    |    |    |    |    |    |    |     |
|-----|----|----|----|----|----|----|----|----|----|----|----|----|----|----|-----|
|     | R  | S  | S  | I  | I  | S  | I  | R  | S  | S  | R  | S  | S  | S  |     |
| 92  | 6  | 20 | 21 | 22 | 17 | 23 | 19 | 6  | 24 | 18 | 8  | 24 | 24 | 25 | MDR |
|     | R  | S  | S  | S  | R  | S  | S  | R  | S  | S  | R  | S  | S  | S  |     |
| 93  | 8  | 6  | 17 | 6  | 6  | 17 | 8  | 19 | 10 | 12 | 6  | 19 | 24 | 16 | MDR |
|     | R  | R  | S  | R  | R  | R  | R  | S  | R  | R  | R  | R  | S  | R  |     |
| 94  | 15 | 8  | 23 | 30 | 18 | 21 | 14 | 12 | 24 | 20 | 12 | 24 | 27 | 25 | MDR |
|     | S  | R  | S  | S  | I  | S  | I  | R  | S  | S  | R  | S  | S  | S  |     |
| 95  | 17 | 6  | 21 | 16 | 6  | 15 | 12 | 6  | 23 | 8  | 6  | 20 | 27 | 11 | MDR |
|     | S  | R  | S  | I  | R  | R  | R  | R  | S  | R  | R  | I  | S  | R  |     |
| 96  | 6  | 9  | 20 | 17 | 17 | 20 | 14 | 6  | 24 | 18 | 10 | 23 | 24 | 23 | MDR |
|     | R  | R  | S  | I  | R  | I  | I  | R  | S  | S  | R  | S  | S  | S  |     |
| 97  | 6  | 20 | 18 | 6  | 18 | 6  | 6  | 6  | 18 | 6  | 7  | 6  | 18 | 6  | MDR |
|     | R  | S  | S  | R  | I  | R  | R  | R  | S  | R  | R  | R  | R  | R  |     |
| 98  | 6  | 20 | 21 | 18 | 15 | 21 | 14 | 6  | 6  | 19 | 10 | 24 | 26 | 26 | MDR |
|     | R  | S  | S  | I  | R  | S  | I  | R  | R  | S  | R  | S  | S  | S  |     |
| 99  | 6  | 11 | 22 | 6  | 6  | 6  | 6  | 6  | 18 | 6  | 6  | 6  | 15 | 6  | MDR |
|     | R  | R  | S  | R  | R  | R  | R  | R  | S  | R  | R  | R  | R  | R  |     |
| 100 | 6  | 8  | 21 | 21 | 18 | 22 | 6  | 6  | 6  | 6  | 10 | 23 | 26 | 29 | MDR |
|     | R  | R  | S  | S  | I  | S  | R  | R  | R  | R  | R  | S  | S  | S  |     |
| 101 | 8  | 6  | 16 | 6  | 6  | 17 | 10 | 6  | 10 | 13 | 6  | 19 | 24 | 20 | MDR |
|     | R  | R  | I  | R  | R  | R  | R  | R  | R  | R  | R  | R  | S  | I  |     |
| 102 | 6  | 21 | 21 | 23 | 18 | 24 | 19 | 6  | 25 | 20 | 10 | 23 | 37 | 28 | MDR |
|     | R  | S  | S  | S  | I  | S  | S  | R  | S  | S  | R  | S  | S  | S  |     |
| 103 | 6  | 22 | 23 | 23 | 18 | 22 | 20 | 6  | 25 | 21 | 10 | 25 | 28 | 28 | MDR |
|     | R  | S  | S  | S  | I  | S  | S  | R  | S  | S  | R  | S  | S  | S  |     |
| 104 | 6  | 6  | 22 | 27 | 17 | 23 | 17 | 6  | 6  | 19 | 9  | 24 | 27 | 28 | MDR |
|     | R  | R  | S  | S  | R  | S  | I  | R  | R  | S  | R  | S  | S  | S  |     |
| 105 | 15 | 10 | 21 | 16 | 6  | 15 | 12 | 6  | 23 | 7  | 6  | 19 | 28 | 18 | MDR |
|     | S  | R  | S  | I  | R  | R  | R  | R  | S  | R  | R  | R  | S  | R  |     |
| 106 | 9  | 10 | 20 | 6  | 6  | 10 | 8  | 6  | 6  | 6  | 6  | 6  | 19 | 6  | MDR |
|     | R  | R  | S  | R  | R  | R  | R  | R  | R  | R  | R  | R  | R  | R  |     |

### Zone of inhibition in millimeter (mm)

**Interpretation: S: Sensitive; I:Intermidate; R: Resistant**

TET: Tetracycline; GN: Gentamicin; Amikacin; CIP: Ciprofloxacin; ATM: Aztreonam; PTZ: Piperacillin/tazobactam; AMC: Amoxicillin-clavulanate; SXT:Trimethoprim/sulfamethoxazole; CHL: Chloramphenicol; CXT: Cefoxitin; CRO: Ceftriaxone; MEM: Meropenem; IMP: Imipenem; ETM: Ertapenem

|     |    |    |    |    |    |    |    |   |    |    |    |    |    |    |     |
|-----|----|----|----|----|----|----|----|---|----|----|----|----|----|----|-----|
| 107 | 13 | 10 | 19 | 14 | 6  | 15 | 11 | 6 | 21 | 6  | 6  | 17 | 26 | 17 | MDR |
|     | I  | R  | S  | R  | R  | R  | R  | R | S  | R  | R  | R  | S  | R  |     |
| 108 | 6  | 8  | 24 | 6  | 6  | 6  | 6  | 6 | 16 | 6  | 6  | 6  | 20 | 6  | MDR |
|     | R  | R  | S  | R  | R  | R  | R  | R | I  | R  | R  | R  | I  | R  |     |
| 109 | 6  | 12 | 24 | 6  | 6  | 6  | 6  | 6 | 17 | 6  | 6  | 7  | 22 | 6  | MDR |
|     | R  | R  | S  | R  | R  | R  | R  | R | I  | R  | R  | R  | I  | R  |     |
| 110 | 6  | 7  | 18 | 6  | 6  | 6  | 6  | 6 | 17 | 6  | 6  | 6  | 18 | 6  | MDR |
|     | R  | R  | S  | R  | R  | R  | R  | R | I  | R  | R  | R  | R  | R  |     |
| 111 | 6  | 10 | 23 | 22 | 23 | 24 | 7  | 6 | 23 | 6  | 11 | 26 | 27 | 26 | MDR |
|     | R  | R  | S  | S  | S  | S  | R  | R | S  | R  | R  | S  | S  | S  |     |
| 112 | 7  | 8  | 20 | 6  | 6  | 17 | 14 | 6 | 6  | 15 | 6  | 26 | 27 | 22 | MDR |
|     | R  | R  | S  | R  | R  | R  | I  | R | R  | I  | R  | S  | S  | S  |     |
| 113 | 6  | 8  | 21 | 19 | 13 | 22 | 12 | 6 | 6  | 21 | 6  | 25 | 29 | 25 | MDR |
|     | R  | R  | S  | I  | R  | S  | R  | R | R  | S  | R  | S  | S  | S  |     |
| 114 | 8  | 11 | 22 | 18 | 10 | 15 | 8  | 6 | 6  | 6  | 6  | 17 | 25 | 15 | MDR |
|     | R  | R  | S  | I  | R  | R  | R  | R | R  | R  | R  | R  | S  | R  |     |
| 115 | 6  | 6  | 20 | 6  | 8  | 7  | 6  | 6 | 6  | 6  | 6  | 6  | 12 | 6  | MDR |
|     | R  | R  | S  | R  | R  | R  | R  | R | R  | R  | R  | R  | R  | R  |     |
| 116 | 6  | 7  | 21 | 28 | 15 | 24 | 15 | 6 | 6  | 21 | 9  | 25 | 28 | 26 | MDR |
|     | R  | R  | S  | S  | R  | S  | I  | R | R  | S  | R  | S  | S  | S  |     |
| 117 | 6  | 11 | 23 | 24 | 18 | 23 | 18 | 6 | 25 | 20 | 8  | 24 | 29 | 27 | MDR |
|     | R  | R  | S  | S  | I  | S  | S  | R | S  | S  | R  | S  | S  | S  |     |
| 118 | 10 | 8  | 20 | 22 | 8  | 19 | 13 | 6 | 24 | 19 | 6  | 23 | 26 | 23 | MDR |
|     | R  | R  | S  | S  | R  | I  | R  | R | S  | S  | R  | S  | S  | S  |     |
| 119 | 10 | 9  | 20 | 23 | 11 | 19 | 12 | 6 | 23 | 20 | 6  | 24 | 28 | 24 | MDR |
|     | R  | R  | S  | S  | R  | I  | R  | R | S  | S  | R  | S  | S  | S  |     |
| 120 | 7  | 8  | 17 | 6  | 6  | 14 | 8  | 6 | 6  | 6  | 6  | 13 | 25 | 6  | MDR |
|     | R  | R  | S  | R  | R  | R  | R  | R | R  | R  | R  | R  | S  | R  |     |
| 121 | 10 | 18 | 22 | 25 | 32 | 23 | 23 | 6 | 11 | 14 | 23 | 30 | 33 | 33 | MDR |
|     | R  | S  | S  | S  | S  | S  | S  | R | R  | R  | S  | S  | S  | S  |     |
| 122 | 10 | 10 | 18 | 24 | 12 | 18 | 12 | 6 | 22 | 19 | 6  | 23 | 28 | 23 | MDR |

### Zone of inhibition in millimeter (mm)

**Interpretation: S: Sensitive; I:Intermidate; R: Resistant**

TET: Tetracycline; GN: Gentamicin; Amikacin; CIP: Ciprofloxacin; ATM: Aztreonam; PTZ: Piperacillin/tazobactam; AMC: Amoxicillin-clavulanate; SXT:Trimethoprim/sulfamethoxazole; CHL: Chloramphenicol; CXT: Cefoxitin; CRO: Ceftriaxone; MEM: Meropenem; IMP: Imipenem; ETM: Ertapenem

|     |    |    |    |    |    |    |    |   |    |    |    |    |    |    |            |
|-----|----|----|----|----|----|----|----|---|----|----|----|----|----|----|------------|
|     | R  | R  | S  | S  | R  | I  | R  | R | S  | S  | R  | S  | S  | S  |            |
| 123 | 6  | 10 | 20 | 24 | 23 | 22 | 15 | 6 | 6  | 21 | 12 | 23 | 28 | 26 | MDR        |
|     | R  | R  | S  | S  | S  | S  | I  | R | R  | S  | R  | S  | S  | S  |            |
| 124 | 10 | 7  | 22 | 24 | 15 | 20 | 12 | 6 | 23 | 18 | 7  | 24 | 28 | 26 | MDR        |
|     | R  | R  | S  | S  | R  | I  | R  | R | S  | S  | R  | S  | S  | S  |            |
| 125 | 14 | 23 | 25 | 31 | 32 | 27 | 23 | 6 | 26 | 23 | 25 | 28 | 32 | 31 | Not<br>MDR |
|     | I  | S  | S  | S  | S  | S  | S  | R | S  | S  | S  | S  | S  | S  |            |
| 126 | 8  | 13 | 28 | 22 | 14 | 25 | 16 | 6 | 6  | 19 | 13 | 23 | 27 | 24 | MDR        |
|     | R  | I  | S  | S  | I  | S  | I  | R | R  | S  | R  | S  | S  | S  |            |
| 127 | 12 | 10 | 22 | 24 | 18 | 16 | 14 | 6 | 26 | 20 | 6  | 24 | 26 | 27 | MDR        |
|     | I  | R  | S  | S  | I  | R  | I  | R | S  | S  | R  | S  | S  | S  |            |
| 128 | 11 | 8  | 20 | 16 | 15 | 22 | 15 | 6 | 6  | 21 | 8  | 23 | 27 | 25 | MDR        |
|     | R  | R  | S  | I  | R  | S  | I  | R | R  | S  | R  | S  | S  | S  |            |
| 129 | 6  | 13 | 25 | 15 | 6  | 8  | 6  | 6 | 6  | 6  | 6  | 26 | 26 | 17 | MDR        |
|     | R  | I  | S  | R  | R  | R  | R  | R | R  | R  | R  | S  | S  | R  |            |
| 130 | 6  | 11 | 23 | 15 | 15 | 20 | 6  | 6 | 23 | 18 | 8  | 27 | 26 | 24 | MDR        |
|     | R  | R  | S  | R  | R  | I  | R  | R | S  | S  | R  | S  | S  | S  |            |
| 131 | 6  | 8  | 23 | 21 | 16 | 23 | 17 | 6 | 6  | 22 | 8  | 28 | 25 | 23 | MDR        |
|     | R  | R  | S  | S  | R  | S  | I  | R | R  | S  | R  | S  | S  | S  |            |
| 132 | 6  | 10 | 25 | 12 | 6  | 18 | 12 | 6 | 13 | 13 | 6  | 27 | 26 | 25 | MDR        |
|     | R  | R  | S  | R  | R  | I  | R  | R | R  | R  | R  | S  | S  | S  |            |

### Zone of inhibition in millimeter (mm)

**Interpretation: S: Sensitive; I:Intermidate; R: Resistant**

TET: Tetracycline; GN: Gentamicin; Amikacin; CIP: Ciprofloxacin; ATM: Aztreonam; PTZ: Piperacillin/tazobactam; AMC: Amoxicillin-clavulanate; SXT: Trimethoprim/sulfamethoxazole; CHL: Chloramphenicol; CXT: Cefoxitin; CRO: Ceftriaxone; MEM: Meropenem; IMP: Imipenem; ETM: Ertapenem
