# Supplementary material for: Detection of blaKPC and blaNDM carbapenemase genes among Klebsiella pneumoniae isolates in Addis Ababa, Ethiopia: Dominance of blaNDM
Source: PubMed Central journal article supplement (PMC9045624; doi:10.1371/journal.pone.0267657), 2022-04-27
Supplement: pone.0267657.s002.pdf [file pone.0267657.s002.pdf]

**S2 Table. Patient characteristics, mCIM test result, ESBL result and carbapenemase genes of 39 carbapenem non-susceptible *K. pneumoniae* isolates at Tikur Anbessa Specialized Hospital**

| Code | Gene                                                  | mCIM test result |          | ESBL with combined disc test | Sex of patient | Age of patient in years | Source of isolation | Hospital unit   |
|------|-------------------------------------------------------|------------------|----------|------------------------------|----------------|-------------------------|---------------------|-----------------|
|      |                                                       | ZI in mm         | Interp.  |                              |                |                         |                     |                 |
| 14   | <i>bla</i> <sub>NDM</sub>                             | 6                | Positive | Negative                     | M              | 13                      | Urine               | ICU             |
| 16   | <i>bla</i> <sub>NDM</sub>                             | 10               | Positive | Negative                     | F              | 26                      | Urine               | Medical ward    |
| 20   | Negative                                              | 22               | Negative | Positive                     | F              | 6                       | Urine               | Pediatrics ward |
| 27   | Negative                                              | 23               | Negative | Positive                     | F              | 60                      | CSF                 | ICU             |
| 31   | <i>bla</i> <sub>NDM</sub>                             | 6                | Positive | Negative                     | M              | 1                       | Wound               | ICU             |
| 32   | <i>bla</i> <sub>NDM</sub>                             | 12               | Positive | Negative                     | M              | 5                       | Sputum              | Pediatrics ward |
| 33   | <i>bla</i> <sub>NDM</sub>                             | 6                | Positive | Negative                     | F              | 5                       | Urine               | ICU             |
| 39   | Negative                                              | 20               | Negative | Positive                     | F              | <1                      | Blood               | Pediatrics ward |
| 49   | <i>bla</i> <sub>NDM</sub> & <i>bla</i> <sub>KPC</sub> | 6                | Positive | Positive                     | M              | 60                      | CSF                 | ICU             |
| 50   | <i>bla</i> <sub>NDM</sub>                             | 6                | Positive | Negative                     | M              | 4                       | Urine               | Pediatrics ward |
| 51   | <i>bla</i> <sub>NDM</sub>                             | 6                | Positive | Negative                     | M              | 3                       | Blood               | Pediatrics ward |
| 54   | <i>bla</i> <sub>NDM</sub>                             | 6                | Positive | Negative                     | M              | 6                       | CSF                 | Pediatrics ward |
| 56   | Negative                                              | 20               | Negative | Negative                     | F              | 12                      | Urine               | ICU             |
| 57   | <i>bla</i> <sub>NDM</sub>                             | 6                | Positive | Negative                     | F              | 5                       | Urine               | Pediatrics ward |
| 61   | <i>bla</i> <sub>NDM</sub>                             | 10               | Positive | Negative                     | M              | 38                      | Blood               | Medical ward    |
| 63   | Negative                                              | 11               | Positive | Negative                     | M              | 50                      | Urine               | Medical ward    |
| 64   | <i>bla</i> <sub>NDM</sub>                             | 6                | Positive | Negative                     | M              | < 1                     | Blood               | Pediatrics ward |
| 67   | <i>bla</i> <sub>NDM</sub>                             | 14               | Positive | Negative                     | M              | 30                      | Blood               | Medical ward    |
| 70   | Negative                                              | 19               | Negative | Positive                     | F              | 4                       | Blood               | Pediatrics ward |
| 74   | Negative                                              | 12               | Positive | Negative                     | M              | 41                      | Wound               | Surgical ward   |
| 81   | <i>bla</i> <sub>NDM</sub>                             | 6                | Positive | Negative                     | F              | < 1                     | Wound               | Pediatrics ward |
| 83   | <i>bla</i> <sub>NDM</sub>                             | 6                | Positive | Positive                     | F              | 28                      | Blood               | Surgical ward   |
| 87   | <i>bla</i> <sub>NDM</sub>                             | 11               | Positive | Negative                     | M              | 17                      | Wound               | Outpatient      |
| 90   | <i>bla</i> <sub>NDM</sub>                             | 8                | Positive | Negative                     | M              | < 1                     | Urine               | Pediatrics ward |
| 93   | <i>bla</i> <sub>NDM</sub>                             | 6                | Positive | Positive                     | F              | 29                      | CSF                 | Surgical ward   |
| 95   | Negative                                              | 21               | Negative | Positive                     | M              | <1                      | Blood               | ICU             |
| 97   | <i>bla</i> <sub>NDM</sub>                             | 6                | Positive | Negative                     | F              | 23                      | Urine               | ICU             |
| 99   | <i>bla</i> <sub>NDM</sub>                             | 6                | Positive | Negative                     | M              | 62                      | CSF                 | ICU             |
| 101  | <i>bla</i> <sub>NDM</sub>                             | 6                | Positive | Positive                     | F              | 32                      | Wound               | Surgical ward   |
| 105  | Negative                                              | 22               | Negative | Positive                     | M              | <1                      | Blood               | ICU             |
| 106  | Negative                                              | 20               | Negative | Negative                     | M              | 2                       | Blood               | Pediatrics ward |
| 107  | Negative                                              | 20               | Negative | Positive                     | F              | 5                       | Wound               | Pediatrics ward |
| 108  | <i>bla</i> <sub>NDM</sub>                             | 6                | Positive | Positive                     | F              | 26                      | Urine               | Medical ward    |
| 109  | <i>bla</i> <sub>NDM</sub>                             | 12               | Positive | Negative                     | M              | 5                       | Urine               | Pediatrics ward |
| 110  | <i>bla</i> <sub>NDM</sub>                             | 6                | Positive | Negative                     | M              | 11                      | Wound               | ICU             |
| 114  | <i>bla</i> <sub>NDM</sub>                             | 6                | Positive | Positive                     | M              | 2                       | Blood               | ICU             |
| 115  | Negative                                              | 21               | Negative | Negative                     | M              | <1                      | Blood               | ICU             |
| 120  | <i>bla</i> <sub>NDM</sub>                             | 13               | Positive | Negative                     | M              | < 1                     | Blood               | Pediatrics ward |
| 129  | Negative                                              | 23               | Negative | Positive                     | F              | 5                       | Urine               | Pediatrics ward |

mCIM: modified Carbapenem Inactivation Method; ESBL: Extended spectrum  $\beta$ -lactamase; Interp: Interpretation; ZI in mm: Zone of inhibition in millimeter; M: Male; F: Female; CSF: Cerebrospinal fluid; ICU: Intensive Care Unit
